# Supplementary material for: Further characterizing Eppawala-AP as a potential Cl-rich apatite Sr isotope reference material
Source: Royal Society of Chemistry journal article supplement (doi:10.1039/d2ja00013j), 2022-01-01
Supplement: d2ja00013j1.xlsx [file d2ja00013j1.xlsx]

## Sheet: Trace
Table S1, Trace element (μg/g) composition of Eppawala-AP measured by LA-ICP-MS in this study.																	Table S1, Trace element (μg/g) composition of Eppawala-AP measured by LA-ICP-MS in this study.
	La	Ce	Pr	Nd	Sm	Eu	Gd	Tb	Dy	Ho	Er	Tm	Yb	Lu	Cs	Rb	Ba	Th	U	K	Nb	Pb	Sr	Zr	Hf	Ti	Y
AP-01	491.237	1102.1	139.125	574.943	80.5987	16.0497	45.3557	3.90553	14.6935	2.29966	4.80616	0.510998	2.93319	0.364072	0.00603858	0.0164423	37.9757	67.3923	3.95503	4.61943	0.0568236	6.72338	4207.77	1.96352	0.0113152	10.5839	59.5297
AP-02	497.133	1115.8	140.048	572.369	80.9477	16.2374	44.9469	3.82381	15.1815	2.2558	4.73929	0.520489	2.85341	0.350858	-	0.0127431	38.6761	67.313	4.04762	1.25509	0.0680539	6.40282	4251.54	1.99411	-	8.72273	59.0291
AP-03	502.314	1107.74	139.522	577.845	82.4202	16.2416	46.2839	3.97319	15.1181	2.28589	4.60123	0.535542	2.68598	0.372726	-	-	33.8983	68.1756	3.99749	1.74697	0.0503894	6.7597	4312.73	1.96283	0.00991043	9.61143	59.5886
AP-04	499.367	1115.36	141.511	576.615	82.6734	16.5975	45.2718	3.82278	14.9397	2.32471	4.72848	0.536547	2.71995	0.342825	-	0.00945905	35.7636	65.7466	3.89097	1.78586	0.0639319	7.94219	4339.1	1.89182	0.00670639	9.37819	59.1337
AP-05	490.502	1100.71	139.644	567.377	81.8389	16.272	45.1229	3.83088	14.8823	2.28273	4.84207	0.511446	2.71894	0.334675	-	-	33.3875	65.7802	3.94397	0.779777	0.0550134	8.23339	4326.19	1.91422	-	8.93262	58.8807
AP-06	469.676	1071.41	136.766	565.047	80.3402	15.6543	44.1989	3.86342	15.0085	2.29575	4.6445	0.511954	2.82446	0.324662	-	0.00560888	36.8535	66.8047	3.96248	1.14926	0.0519172	6.46094	4207.65	1.91957	-	7.93513	58.4804
AP-07	470.444	1062.55	136.472	553.567	81.3201	15.4251	44.7068	3.8242	14.7859	2.23032	4.55178	0.534353	2.73175	0.340598	0.00791333	-	35.6504	66.5825	3.94999	1.09966	0.0543662	6.25997	4188.97	1.99912	-	9.81616	57.3532
AP-08	468.215	1066.49	135.85	556.193	81.048	15.4574	42.8806	3.70994	14.6425	2.17408	4.54904	0.50613	2.66953	0.316665	-	-	36.943	65.9882	4.0136	1.33338	0.0472154	6.44477	4143.63	2.00679	-	9.0026	57.7669
AP-09	535.955	1129.82	149.541	635.063	98.3898	17.7411	52.9227	4.55962	18.742	2.77131	5.85803	0.639725	3.19417	0.421281	-	-	25.81	69.7112	3.58788	31.4933	0.0441274	7.79248	4622.75	2.10269	0.0166922	16.2681	75.1349
AP-10	454.519	1000.99	128.914	540.22	78.9219	15.3777	43.4519	3.7252	14.8836	2.24619	4.70409	0.507002	2.80108	0.359401	-	-	32.365	63.8703	3.71461	2.63885	0.0414267	6.17624	3975.93	1.79714	0.00737135	6.83471	59.6026
AP-11	475.479	1083.1	132.286	536.588	77.0759	15.004	40.6719	3.53232	13.7665	2.20658	4.35625	0.468917	2.51252	0.294432	-	-	35.5241	62.4799	3.73998	6.28613	0.0402174	6.87344	4191.1	1.77703	0.00880067	10.4168	54.9835
AP-12	506.431	1112.93	139.202	563.212	80.3229	16.3182	43.469	3.84443	14.8711	2.24881	4.41508	0.515859	2.7628	0.318092	0.00841108	0.0233485	31.5396	66.3254	3.88563	5.71074	0.0680111	7.42633	4284.32	1.94266	-	7.97089	58.3996
AP-13	551.019	1142.68	144.587	582.185	82.052	17.2822	45.3344	3.93362	15.2212	2.38052	5.07325	0.540839	3.12541	0.376413	-	-	30.3596	66.3753	3.56754	9.24808	0.0613073	6.48324	4090.54	1.60712	-	6.70323	61.7624
AP-14	594.225	1259.8	157.872	637.992	88.9069	18.3111	47.4615	3.99277	16.2779	2.42058	5.09438	0.577402	3.23802	0.368834	-	-	38.4495	74.4163	3.99426	2.60173	0.0502331	6.31581	4363.65	1.89837	0.0160083	7.2702	64.5441
AP-15	605.175	1280.08	160.209	640.085	91.3446	19.2114	48.5045	4.18269	16.533	2.44921	5.30075	0.556296	2.98732	0.392829	-	-	32.3149	78.0532	4.02905	5.2936	0.0561497	6.60828	4262.4	1.92603	0.00985844	6.69814	66.3446
AP-16	619.75	1325.81	164.226	660.133	92.2906	19.6333	49.7971	4.36452	17.1453	2.58679	5.45948	0.604186	3.31003	0.420715	0.00537245	-	35.0002	75.8508	4.13352	5.27764	0.0507927	6.69016	4424.41	1.90765	0.00598299	5.80103	68.2816
AP-17	634.016	1341.58	166.256	667.806	92.8604	19.775	49.1913	4.25425	17.1975	2.61325	5.48235	0.568582	3.01943	0.400303	-	-	31.1587	75.2832	4.00526	1.28293	0.0506244	6.64739	4424.78	1.71384	-	6.70343	66.6955
AP-18	666.089	1396.46	173.251	692.353	95.686	20.7015	50.2889	4.44853	17.3932	2.69558	5.3579	0.607675	3.22691	0.404584	-	0.00789802	32.9542	76.2058	4.01729	1.33564	0.0722167	6.73736	4515.45	1.65469	0.0061738	7.76304	69.1669
AP-19	674.972	1421.84	172.548	699.805	94.1445	20.4789	49.3526	4.33164	16.805	2.59877	5.49483	0.616076	3.18313	0.389309	-	0.0251143	32.2917	73.6141	3.94069	1.02015	0.0534302	6.35126	4497.93	1.69385	0.00610508	6.08736	69.6666
AP-20	660.127	1381.95	169.824	683.286	93.7325	20.0387	48.7774	4.32241	16.7801	2.5523	5.30957	0.611249	3.23992	0.410577	-	0.0241571	34.7619	74.5622	3.98715	1.87673	0.0671552	6.3815	4462.66	1.65165	-	5.27268	68.41
AP-21	659.142	1388.03	168.877	682.632	92.6414	20.6231	49.7624	4.26361	17.2136	2.54312	5.54005	0.571258	3.22447	0.415634	0.00609233	0.0205497	34.8357	75.1784	4.00686	3.10348	0.0517902	6.25667	4544.68	1.58836	-	8.48441	67.9725
AP-22	517.868	1102.27	137.078	563.144	77.5473	16.4689	42.3533	3.7405	14.9354	2.2369	4.76658	0.514213	2.92958	0.355124	0.00525884	-	32.9162	63.5808	3.53719	8.95275	0.0419919	5.98915	4196.47	1.64815	0.00790785	7.6594	59.3874
AP-23	634.231	1325.03	162.035	659.13	89.8669	19.7793	48.2235	4.2786	17.0225	2.55329	5.28484	0.607261	3.18343	0.392526	-	0.00697789	23.8892	77.2259	4.05639	0.821462	0.0592754	6.80701	4437.48	1.77888	-	6.94945	67.0033
AP-24	496.731	1097.32	143.214	599.518	85.9374	16.2562	47.0875	4.08814	15.8783	2.36563	4.86454	0.529295	2.75098	0.332829	-	0.0133392	39.2739	69.9598	4.26372	1.6674	0.0612286	6.67991	4125.05	2.35839	0.0121092	7.31103	63.1501
AP-25	496.53	1094.79	141.655	602.565	86.7117	16.474	46.4671	4.17499	16.1186	2.34483	4.91202	0.508882	2.76792	0.347756	-	0.0263019	38.4536	70.013	4.09574	1.85217	0.0495597	6.74795	4117.11	2.28446	-	7.31082	61.8463
AP-26	489.298	1080.23	139.309	591.275	84.8389	16.0262	45.6766	3.9983	15.4086	2.30261	4.79993	0.53636	2.74043	0.318589	-	0.00896135	36.0763	67.797	4.05773	0.816497	0.0763867	6.65819	4126.7	2.2791	-	6.88313	61.0738
AP-27	464.791	1019.23	135.373	583.61	86.0521	16.2385	47.0908	4.05217	16.3503	2.30067	4.80583	0.540183	2.75379	0.359883	0.00820795	0.0566359	31.8024	69.1874	3.74169	7.46089	0.0410156	7.02942	4035.67	2.0309	-	5.43084	62.7224
AP-28	498.157	1110.08	143.506	603.103	86.9822	16.2877	46.0554	4.1671	16.1205	2.33155	4.9069	0.534206	2.89921	0.348641	-	0.0235296	38.1791	70.4655	4.1344	4.17603	0.0594216	6.79679	4193.78	2.38515	0.00809313	7.29753	62.6938
AP-29	448.836	1028.74	135.553	574.487	85.7916	16.641	45.7559	4.13752	16.1217	2.41752	4.95164	0.507774	2.8693	0.357761	0.00837023	0.0597162	32.1731	73.6215	3.75718	21.6457	0.0514029	7.04084	4081.47	2.06903	0.00823461	6.36873	62.5598
AP-30	507.539	1121.7	144.821	614.712	88.968	16.6979	48.0169	4.13082	16.241	2.439	4.97138	0.560235	2.96274	0.333168	-	0.00591046	33.0812	72.4845	4.27765	1.92043	0.0529696	7.28041	4170.82	2.27552	0.0105941	7.3367	63.103
AP-31	495.118	1084.76	141.668	594.644	86.6285	16.5724	47.0787	4.11701	16.3232	2.36651	4.86492	0.502141	2.84136	0.343046	-	0.0170179	39.458	70.9236	4.1052	1.9767	0.0555256	6.77727	4103.67	2.1984	-	6.98544	61.6982
AP-32	500.057	1097.56	142.738	599.232	88.4935	16.6439	46.4896	4.06347	16.1816	2.35363	4.84165	0.534395	2.87886	0.337273	-	0.00655873	35.7419	69.1341	4.11074	1.63412	0.0533955	6.73851	4163.84	2.3555	-	7.2234	62.1977
AP-33	503.073	1104.06	142.62	596.286	87.1567	16.2677	46.8593	3.98419	16.2764	2.42907	4.90898	0.51975	2.70698	0.35047	-	-	37.9658	68.5792	3.99972	1.4646	0.0383593	6.53987	4153.02	2.35988	0.0110589	7.03976	61.8949
AP-34	506.326	1126.02	144.216	607.633	88.2051	16.5944	46.8635	4.07355	16.8025	2.37858	4.95577	0.519812	2.94247	0.348431	-	0.0132822	38.0488	71.2849	4.17289	0.56782	0.0646644	6.98054	4158.28	2.34504	0.00659664	6.93884	62.8277
AP-35	510.71	1123.89	144.897	614.535	90.0672	16.6773	47.8232	4.18561	16.4345	2.43813	5.09138	0.536386	2.79731	0.369518	-	0.0163181	34.6545	72.2785	4.16974	0.424687	0.0449357	6.8692	4184.45	2.28237	-	5.51742	64.0557
AP-36	488.37	1082.39	140.531	594.816	87.5975	16.8603	47.2365	4.0815	16.1692	2.41573	4.87024	0.538521	2.7401	0.353797	-	0.0214558	32.4029	70.9341	4.01334	2.46514	0.0356573	7.02837	4022.94	2.24248	-	6.84056	62.7955
AP-37	499.773	1103.68	141.726	599.841	88.6415	16.4629	45.8959	4.07502	15.8745	2.39597	4.83364	0.530052	2.95945	0.353518	-	0.0120473	34.4689	70.0367	4.20297	1.42691	0.0518151	6.98122	4137.54	2.14764	0.00874446	8.64898	62.152
AP-38	510.606	1119.28	146.101	611.11	90.1095	16.7997	47.6356	4.0653	16.5425	2.38342	5.17104	0.553627	3.08937	0.381624	0.00511524	-	37.6083	71.55	4.24709	0.254062	0.0672625	7.00225	4134.84	2.48377	-	6.44541	64.1456
AP-39	510.298	1122.99	144.067	604.224	89.5733	16.6406	47.4661	4.11941	16.2683	2.42006	4.86347	0.542404	2.92076	0.33051	-	0.0166105	35.8791	71.244	4.24344	0.452535	0.0478589	6.81409	4169.26	2.4793	-	8.03135	62.6258
AP-40	516.65	1132.22	146.761	617.079	91.0988	16.8562	48.228	4.26481	16.4594	2.35165	5.01179	0.547115	2.87357	0.35498	-	-	36.9539	72.5729	4.26218	0.849922	0.0598408	6.99906	4174.82	2.2822	-	7.14379	63.6701
AP-41	515.686	1124.13	145.527	619.449	91.1609	16.6325	48.234	4.16529	16.7331	2.40164	5.02218	0.52819	2.82965	0.352171	-	-	39.2351	73.0026	4.30312	1.41341	0.0633503	6.73759	4192.77	2.31184	-	7.84624	64.2633
AP-42	524.081	1142.73	146.784	624.788	91.1177	16.851	49.4894	4.32226	17.0093	2.44985	5.00595	0.523153	2.94701	0.356039	-	0.042486	35.9102	74.6273	4.50031	1.47501	0.0526571	7.05018	4163.93	2.44182	-	7.49813	64.8949
AP-43	702.015	1512.74	178.787	695.399	92.5054	21.7328	46.457	4.09986	16.2051	2.46491	5.10492	0.552952	3.16683	0.399391	-	-	24.161	77.3185	4.20857	5.63772	0.0749387	6.82122	4451.34	1.57633	0.00717032	8.0331	64.897
AP-44	485.968	1079.96	138.707	588.684	85.8819	15.6834	45.274	3.87708	15.4542	2.2926	4.47864	0.482066	2.68565	0.331541	-	-	25.8602	67.0284	4.16339	3.01671	0.058571	6.46714	4107.9	2.35228	0.0059947	6.40939	60.4311
AP-45	483.243	1081.12	136.616	555.936	80.9451	15.5609	41.3384	3.58699	14.4235	2.10012	4.27293	0.464662	2.55299	0.30564	0.00747673	0.0133212	26.4675	62.7793	4.05602	4.90334	0.045351	6.49084	4262.74	1.94602	0.00590849	9.2685	56.5273
AP-46	484.932	1126.92	134.482	555.555	78.789	15.475	41.0151	3.55172	14.1677	2.08019	4.28252	0.437743	2.42711	0.332972	-	0.00711328	19.0273	62.6066	3.97302	4.09394	0.0472847	6.80479	4181.18	1.97756	-	8.67195	56.1017
AP-47	479.874	1064.52	131.871	547.708	77.969	15.0553	39.8713	3.55526	14.3439	2.00675	4.28784	0.473786	2.58959	0.303079	0.0062734	0.0256679	25.4079	60.6358	3.80826	4.40244	0.0560558	6.49458	4254.86	1.86345	0.00622801	7.15885	54.1836
AP-48	485.025	1067.99	134.454	558.056	80.2783	15.5155	42.5303	3.63301	14.6165	2.13943	4.42312	0.490653	2.61876	0.320839	-	0.0219228	33.603	63.779	3.92171	8.42184	0.0490534	6.54433	4276.22	1.99699	0.00578744	7.92896	56.9682
AP-49	500.103	1108.68	140.356	574.03	84.1268	16.3577	43.6483	3.80685	15.0318	2.20646	4.45662	0.524798	2.6417	0.321992	-	0.0105359	21.9608	67.3482	4.03783	2.94303	0.047404	6.70945	4278.96	2.07222	0.00813281	7.4443	59.0652
AP-50	475.664	1079.6	134.827	549.051	80.2516	15.6779	40.8301	3.68931	14.4305	2.08104	4.45409	0.500433	2.5254	0.33903	0.00532903	0.00507558	25.7789	66.3892	3.98063	2.44647	0.0563413	6.66558	4148.31	2.06831	-	7.67851	56.7945
-, below detection limit.

## Sheet: LA-Sr
Table S2, Sr isotope result of Eppawala-AP and reference materials using LA-MC-ICP-MS in this study.
Sample	Rb/Sr	87Sr/86Sr	2SE	84Sr/86Sr	88Sr (V)	n	Labs
1-01	5.73346e-05	0.704975	3.76342e-05	0.0563888	12.4778		HFUT
1-02	6.85526e-05	0.704885	3.49141e-05	0.0563367	12.4286		HFUT
1-03	4.58431e-05	0.70489	3.86774e-05	0.0563388	12.0205		HFUT
1-04	6.84678e-05	0.70496	4.44412e-05	0.0563368	11.6317		HFUT
1-05	7.56748e-05	0.704928	3.7062e-05	0.0562945	11.6844		HFUT
1-06	5.72342e-05	0.704878	3.74314e-05	0.0562493	11.5708		HFUT
1-07	3.38639e-05	0.704915	3.05358e-05	0.0563573	11.7818		HFUT
1-08	5.7023e-05	0.70494	3.82393e-05	0.0563019	11.5753		HFUT
1-09	5.66159e-05	0.70491	3.83696e-05	0.0563212	11.2018		HFUT
1-10	4.57944e-05	0.704934	4.07707e-05	0.0557799	11.1778		HFUT
1-11	4.60428e-05	0.70493	4.0669e-05	0.0563036	11.1015		HFUT
1-12	3.95374e-05	0.704888	4.52787e-05	0.056213	11.004		HFUT
1-13	3.98713e-05	0.704934	3.49775e-05	0.0563285	11.1336		HFUT
1-14	6.37299e-05	0.704946	3.58538e-05	0.0563631	11.2023		HFUT
1-15	4.41616e-05	0.704921	4.03333e-05	0.0563465	11.0771		HFUT
1-16	3.33742e-05	0.704924	3.45169e-05	0.056332	10.9098		HFUT
1-17	3.09355e-05	0.704954	3.77123e-05	0.0563515	10.4028		HFUT
1-18	5.73069e-05	0.705002	4.06627e-05	0.0563408	10.5747		HFUT
1-19	3.82571e-05	0.704907	4.38125e-05	0.0563396	10.3205		HFUT
1-20	2.59592e-05	0.704957	4.33955e-05	0.0563453	10.4718		HFUT
1-21	3.84889e-05	0.704964	4.02648e-05	0.056345	10.1661		HFUT
1-22	4.97771e-05	0.704981	3.81341e-05	0.0562908	10.5904		HFUT
1-23	3.93321e-05	0.704972	3.38217e-05	0.0563162	10.6654		HFUT
1-24	7.00053e-05	0.704999	4.09413e-05	0.0563036	11.1217		HFUT
1-25	3.75736e-05	0.704967	4.16793e-05	0.0562959	11.8717		HFUT
1-26	6.17271e-05	0.704985	3.87408e-05	0.0563165	11.1029		HFUT
1-27	0.000109389	0.704972	4.04724e-05	0.0563156	10.6936		HFUT
1-28	0.000134217	0.705028	3.33846e-05	0.0561849	15.7036		HFUT
1-29	6.10515e-05	0.705027	3.16328e-05	0.0563146	19.0235		HFUT
1-30	0.000204798	0.704963	6.03688e-05	0.0562543	8.12366		HFUT
1-31	0.000232087	0.704878	4.5238e-05	0.0563124	7.92454		HFUT
1-32	0.000240154	0.704976	5.29478e-05	0.0562736	9.42016		HFUT
1-33	0.000457738	0.704915	4.33249e-05	0.056334	7.7905		HFUT
1-34	9.69811e-05	0.705074	2.78563e-05	0.0563338	18.2233		HFUT
1-35	3.39256e-05	0.705079	3.29924e-05	0.0563228	16.5037		HFUT
1-36	4.03294e-05	0.704925	4.44642e-05	0.0563418	10.456		HFUT
1-37	5.10794e-05	0.70501	3.43932e-05	0.056299	13.14		HFUT
1-38	3.41561e-05	0.70503	3.75651e-05	0.0562719	12.6136		HFUT
1-39	6.28732e-05	0.705021	4.02606e-05	0.0562734	12.5349		HFUT
1-40	4.33077e-05	0.705035	4.15547e-05	0.0563184	12.7889		HFUT
1-41	5.93572e-05	0.705003	3.30798e-05	0.0562994	12.2739		HFUT
1-42	4.17006e-05	0.705012	3.18823e-05	0.0563337	12.8542		HFUT
1-43	4.8664e-05	0.705011	4.06003e-05	0.0556513	12.3896		HFUT
1-44	4.44064e-05	0.705012	3.90863e-05	0.0562895	11.8479		HFUT
	7.45159e-05	0.704964	0.00010 (2SD)	0.0562855	11.7175	44	HFUT
Otter Lake	0.00253448	0.704211	6.15828e-05	0.0575469	6.30658		HFUT
Otter Lake	0.00169288	0.704192	6.04326e-05	0.0575984	6.15284		HFUT
Otter Lake	0.00194708	0.704242	6.20352e-05	0.0576484	5.99451		HFUT
	0.00205815	0.704215	0.00005(2SD)	0.0575979	6.15131	3	HFUT
Slyudyanka	0.000484181	0.707658	6.6328e-05	0.0564944	4.73872		HFUT
Slyudyanka	0.000247434	0.70757	6.94456e-05	0.0565197	4.85652		HFUT
Slyudyanka	0.000278204	0.707582	6.55909e-05	0.0565221	4.74307		HFUT
Slyudyanka	0.000233844	0.707607	8.06473e-05	0.0564597	4.51462		HFUT
Slyudyanka	0.000141636	0.707705	6.42822e-05	0.0565248	4.74098		HFUT
Slyudyanka	0.000101578	0.70759	8.80058e-05	0.0531686	4.19628		HFUT
Slyudyanka	0.000350795	0.70763	7.95844e-05	0.0533556	3.87989		HFUT
Slyudyanka	0.000317958	0.707664	8.14743e-05	0.0565839	3.7195		HFUT
Slyudyanka	0.000147256	0.707707	7.53444e-05	0.0565057	3.82275		HFUT
Slyudyanka	0.00015515	0.70762	7.83288e-05	0.0564843	3.78749		HFUT
	0.000245804	0.707633	0.00010(2SD)	0.0558619	4.29998	10	HFUT
2-01	5.12806e-07	0.704948	2.73787e-05	0.0566973	14.0237		CUG
2-02	6.33424e-07	0.704964	2.6106e-05	0.0567144	13.8749		CUG
2-03	1.02811e-06	0.704912	3.23043e-05	0.0567359	14.2667		CUG
2-04	-	0.70493	2.57596e-05	0.0567046	14.2239		CUG
2-05	7.40344e-07	0.704923	2.50792e-05	0.0567015	14.006		CUG
2-06	2.32557e-06	0.704966	2.28951e-05	0.056734	14.1434		CUG
2-07	-	0.704976	2.46692e-05	0.0567061	14.0125		CUG
2-08	-	0.704978	2.83632e-05	0.056733	13.9588		CUG
2-09	7.6701e-07	0.704933	2.47332e-05	0.0567304	14.9096		CUG
2-10	-	0.704905	3.02451e-05	0.056718	15.1348		CUG
2-11	-	0.704927	2.47272e-05	0.0567191	15.5683		CUG
2-12	2.08443e-06	0.704913	2.52593e-05	0.0567005	15.2352		CUG
2-13	-	0.704949	2.61418e-05	0.0566929	14.8394		CUG
2-14	-	0.704952	2.40048e-05	0.0567066	14.3869		CUG
2-15	1.12285e-06	0.704946	2.55047e-05	0.0567465	14.6749		CUG
2-16	-	0.704936	2.30005e-05	0.0567267	14.5017		CUG
2-17	8.10266e-06	0.70488	3.54738e-05	0.0566956	9.5055		CUG
2-18	7.01475e-06	0.704904	5.15154e-05	0.0567244	11.1607		CUG
2-19	5.45547e-06	0.705029	8.523e-05	0.0567937	9.64137		CUG
2-20	4.55892e-06	0.704874	3.36573e-05	0.0566836	12.5524		CUG
2-21	6.64246e-06	0.704961	2.7622e-05	0.0567378	12.6369		CUG
2-22	5.94756e-06	0.704891	3.25948e-05	0.0567235	13.4762		CUG
2-23	9.05003e-06	0.704943	3.11835e-05	0.0567724	10.7331		CUG
2-24	5.11418e-06	0.704939	3.44788e-05	0.0567409	11.0765		CUG
2-25	-	0.704893	2.84342e-05	0.0566856	17.4101		CUG
2-26	8.37003e-07	0.704903	2.67185e-05	0.0566955	17.0733		CUG
2-27	8.37812e-07	0.704894	2.25661e-05	0.0567143	17.897		CUG
2-28	2.08931e-06	0.704913	2.2611e-05	0.056704	17.3044		CUG
2-29	-	0.704889	2.56108e-05	0.0566959	17.6283		CUG
2-30	-	0.704913	2.34193e-05	0.0567071	17.821		CUG
2-31	1.30369e-06	0.704915	2.59526e-05	0.0567177	18.6699		CUG
2-32	6.35685e-07	0.704919	2.29349e-05	0.0566954	17.7645		CUG
2-33	1.28336e-06	0.704949	2.344e-05	0.0567106	16.3104		CUG
2-34	7.29489e-07	0.704948	2.35574e-05	0.0567119	16.1898		CUG
2-35	-	0.704983	2.41687e-05	0.0567146	15.7678		CUG
2-36	6.87693e-07	0.704948	2.19467e-05	0.0567139	16.0844		CUG
2-37	7.43729e-07	0.704939	2.43581e-05	0.056751	16.1209		CUG
2-38	-	0.704996	2.5134e-05	0.0567039	16.0269		CUG
2-39	6.0283e-07	0.704946	2.31774e-05	0.0567158	16.7512		CUG
2-40	-	0.704971	2.28668e-05	0.0567157	16.8441		CUG
	2.72505e-06	0.704935	0.00007(2SD)	0.0567173	14.8552	40	CUG
MAD	6.88016e-06	0.711975	3.47501e-05	0.0563915	7.6339		CUG
MAD	2.98768e-06	0.711882	3.44941e-05	0.056508	8.91759		CUG
MAD	1.67279e-06	0.711876	3.23325e-05	0.0563429	8.77256		CUG
MAD	-	0.711866	3.16924e-05	0.0563435	9.01806		CUG
MAD	-2.37823e-07	0.711891	3.14899e-05	0.0563385	9.06005		CUG
MAD	6.27416e-07	0.711868	2.9661e-05	0.0562385	10.472		CUG
MAD	-2.46829e-07	0.711901	3.20568e-05	0.0562012	10.7495		CUG
MAD	-	0.711929	2.90716e-05	0.0562358	10.4618		CUG
	1.94723e-06	0.711899	0.00007(2SD)	0.056325	9.38569	8	CUG
MACS-3	2.63227e-05	0.707478	4.30467e-05	0.0566087	24.3		CUG
MACS-3	7.27907e-06	0.7075	3.5803e-05	0.0565786	22.721		CUG
MACS-3	4.62005e-06	0.707489	4.05735e-05	0.0565786	26.1025		CUG
	1.27406e-05	0.707489	0.00002(2SD)	0.0565886	24.3745	3	CUG
3-01	4.50728e-06	0.70504	3.17932e-05	0.0555257	26.4341		SS
3-02	2.01492e-06	0.705051	2.74366e-05	0.0555323	25.837		SS
3-03	2.87501e-06	0.705042	3.09564e-05	0.0555347	26.0373		SS
3-04	2.31513e-06	0.705047	2.49849e-05	0.055551	27.7745		SS
3-05	3.13298e-06	0.705049	3.03274e-05	0.0555496	27.1905		SS
3-06	2.77615e-06	0.705055	3.08959e-05	0.0555344	26.468		SS
3-07	2.45704e-06	0.705044	2.74127e-05	0.0555449	26.8834		SS
3-08	3.23697e-06	0.705042	2.80726e-05	0.0555407	26.892		SS
3-09	3.78794e-06	0.705029	2.81926e-05	0.0555681	26.2529		SS
3-10	3.33448e-06	0.705018	2.91165e-05	0.0555616	26.1662		SS
3-11	2.42371e-06	0.705001	2.99823e-05	0.0554548	25.4012		SS
3-12	3.20237e-06	0.704999	2.86485e-05	0.0554807	25.9298		SS
3-13	5.00032e-06	0.704999	2.55288e-05	0.0554848	25.742		SS
3-14	3.29142e-06	0.705003	2.71222e-05	0.0554753	26.4158		SS
3-15	3.03965e-06	0.704996	2.93509e-05	0.0554718	26.2262		SS
3-16	1.82189e-06	0.705024	2.88348e-05	0.0554764	27.3654		SS
3-17	2.20809e-06	0.704994	2.37361e-05	0.0554774	26.3943		SS
3-18	3.62438e-06	0.704998	2.53366e-05	0.0554875	26.6523		SS
3-19	2.66261e-06	0.705005	2.81794e-05	0.0554979	26.1781		SS
3-20	1.82768e-06	0.705011	3.45931e-05	0.0554802	26.0502		SS
3-21	3.837e-06	0.70503	2.81262e-05	0.0555669	27.9143		SS
3-22	4.45513e-06	0.705033	2.90137e-05	0.0555868	29.056		SS
3-23	3.61726e-06	0.705019	2.46552e-05	0.0555827	30.7704		SS
3-24	5.13887e-06	0.705063	3.15807e-05	0.0556841	24.2466		SS
3-25	3.75563e-06	0.705047	2.58301e-05	0.0555921	29.8764		SS
3-26	6.1057e-06	0.705056	2.5979e-05	0.0557244	25.768		SS
3-27	3.22404e-06	0.705037	2.60075e-05	0.055612	32.0917		SS
3-28	4.34868e-06	0.705027	2.41798e-05	0.055614	33.2632		SS
3-29	3.02475e-06	0.705037	2.56329e-05	0.0556148	33.9086		SS
3-30	2.84033e-06	0.705014	3.00389e-05	0.0555215	32.6869		SS
3-31	4.55946e-06	0.705012	2.41104e-05	0.0555219	33.5999		SS
3-32	1.9237e-06	0.705039	2.39942e-05	0.0555197	33.2562		SS
3-33	2.39307e-06	0.705027	2.46649e-05	0.0555211	33.9713		SS
3-34	2.4048e-06	0.705023	2.48137e-05	0.055536	34.3922		SS
3-35	2.14855e-06	0.705014	2.25173e-05	0.0555338	34.5797		SS
3-36	2.97435e-06	0.705007	2.3303e-05	0.055537	35.9442		SS
3-37	1.82609e-06	0.705017	2.2983e-05	0.0555406	35.338		SS
3-38	3.51978e-06	0.705008	2.65556e-05	0.0555422	35.5326		SS
3-39	2.41408e-06	0.705019	2.68397e-05	0.0555414	35.1889		SS
3-40	2.88476e-06	0.705009	2.37181e-05	0.0555486	34.8487		SS
3-41	2.4438e-06	0.705039	2.43892e-05	0.0554813	33.0878		SS
3-42	2.52405e-06	0.705053	2.3232e-05	0.0554865	33.2128		SS
3-43	6.54394e-06	0.705041	2.50073e-05	0.0554917	32.5337		SS
3-44	2.55348e-06	0.70504	2.73126e-05	0.0554852	33.4051		SS
3-45	3.93618e-06	0.705036	3.00089e-05	0.0555048	33.0221		SS
3-46	2.37947e-06	0.705042	2.79954e-05	0.0554902	34.6825		SS
3-47	2.62756e-06	0.705043	2.80242e-05	0.0554798	35.1975		SS
3-48	2.12324e-06	0.705043	2.29898e-05	0.0554942	35.6759		SS
3-49	2.06366e-06	0.705038	2.52114e-05	0.0554908	35.3547		SS
3-50	2.16771e-06	0.70504	2.75405e-05	0.0554932	35.1214		SS
	3.12598e-06	0.705028	0.00004(2SD)	0.0555314	30.3164	50	SS
Durango	3.32562e-05	0.706253	0.000131694	0.0601249	1.83735		SS
Durango	3.8053e-05	0.706393	0.000151421	0.0602726	1.55535		SS
Durango	2.45252e-05	0.706187	0.000134328	0.0608094	1.50416		SS
	3.19448e-05	0.706278	0.00021(2SD)	0.0604023	1.63229	3	SS
MAD	2.24533e-05	0.711783	3.87151e-05	0.0565202	10.4509		SS
MAD	2.17899e-05	0.711803	3.52358e-05	0.056523	10.8615		SS
MAD	2.48649e-05	0.711825	3.46932e-05	0.0565484	10.9387		SS
MAD	2.88783e-05	0.711783	3.68303e-05	0.0565748	10.8745		SS
MAD	2.3327e-05	0.71182	3.98741e-05	0.0565473	9.55673		SS
MAD	2.21969e-05	0.711806	3.89408e-05	0.0565308	9.23954		SS
MAD	3.104e-05	0.711787	3.92988e-05	0.0566061	8.63158		SS
	2.49357e-05	0.711801	0.00004(2SD)	0.0565501	10.0791	7	SS
2SD = 2* standard deviation calculated from n separate runs; denotes long-term “external” reproducibility, 2SE(2σ) = 2* standard error of the mean; denotes within-run (“internal”) precision of the data.

## Sheet: TIMS-Sr
Table S3, Sr isotope result of Eppawala-AP and reference materials using TIMS in this study.
Sample	87Sr/86Sr	2SE	n	Labs
1-1	0.704986	1.01394e-05		CUG
1-2	0.704986	8.64633e-06		CUG
1-3	0.704983	1.00776e-05		CUG
1-4	0.704988	9.38839e-06		CUG
	0.704986	0.000004(2SD)	4	CUG
NBS-987	0.710244	7e-06		CUG
	0.710242	5e-06		CUG
	0.710242	5e-06		CUG
	0.710246	6e-06		CUG
	0.710258	6e-06		CUG
	0.710245	5e-06		CUG
	0.710251	5e-06		CUG
	0.710253	4e-06		CUG
	0.710246	7e-06		CUG
	0.710219	9e-06		CUG
	0.71024	5e-06		CUG
	0.710244	0.000020(2SD)	11	CUG
BCR-2	0.705008	6e-06		CUG
	0.705042	4.19466e-06		CUG
	0.705008	5e-06		CUG
	0.705013	7e-06		CUG
	0.705028	7e-06		CUG
	0.705023	6e-06		CUG
	0.70502	0.000027(2SD)	6	CUG
2-1	0.704984	1.4e-05		IGGCAS
2-2	0.705008	1e-05		IGGCAS
2-3	0.70498	1.1e-05		IGGCAS
2-4	0.704996	1.2e-05		IGGCAS
2-5	0.704993	1.3e-05		IGGCAS
	0.704992	0.000022(2SD)	5	IGGCAS
NBS-987	0.710254	1.2e-05		IGGCAS
	0.710251	1.6e-05	5	IGGCAS1
	0.710245	1.1e-05	5	IGGCAS2
	0.710258	1.6e-05	6	IGGCAS3
	0.710245	1.1e-05	6	IGGCAS4
	0.710256	1.6e-05	5	IGGCAS5
	0.710256	1.8e-05	6	IGGCAS6
	0.71025	1.2e-05	5	IGGCAS7
	0.710252	0.000010(2SD)	7	IGGCAS
BCR-2	0.705015	1.45082e-05	10	IGGCAS1
	0.705004	1.68655e-05	9	IGGCAS2
	0.705021	1.83848e-05	2	IGGCAS3
	0.705011	1.82343e-05	10	IGGCAS4
	0.705026	8.48528e-06	2	IGGCAS5
	0.704998	2.70964e-05	8	IGGCAS6
	0.705018	2.06173e-05	8	IGGCAS7
	0.705013	0.000020(2SD)	7	IGGCAS
2SD = 2* standard deviation calculated from n separate runs; denotes long-term “external” reproducibility, 2SE(2σ) = 2* standard error of the mean; denotes within-run (“internal”) precision of the data.
[1] Li C F, Chu Z Y, Guo J H, et al. A rapid single column separation scheme for high-precision Sr–Nd–Pb isotopic analysis in geological samples using thermal ionization mass spectrometry[J]. Analytical Methods, 2015, 7(11): 4793-4802.
[2] Li C F, Wang X C, Guo J H, et al. Rapid separation scheme of Sr, Nd, Pb, and Hf from a single rock digest using a tandem chromatography column prior to isotope ratio measurements by mass spectrometry[J]. Journal of Analytical Atomic Spectrometry, 2016, 31(5): 1150-1159.
[3] Li C F, Wu H Q, Chu Z Y, et al. Precise determination of radiogenic Sr and Nd isotopic ratios and Rb, Sr, Sm, Nd elemental concentrations in four coal ash and coal fly ash reference materials using isotope dilution thermal ionization mass spectrometry[J]. Microchemical Journal, 2019, 146: 906-913.
[4] Li C F, Guo J H, Yang Y H, et al. Single-step separation scheme and high-precision isotopic ratios analysis of Sr–Nd–Hf in silicate materials[J]. Journal of Analytical Atomic Spectrometry, 2014, 29(8): 1467-1476.
[5] Li C F, Li X H, Li Q L, et al. Rapid and precise determination of Sr and Nd isotopic ratios in geological samples from the same filament loading by thermal ionization mass spectrometry employing a single-step separation scheme[J]. Analytica chimica acta, 2012, 727: 54-60.
[6] Li C F, Chu Z Y, Wang X C, et al. Sr isotope analysis of picogram-level samples by thermal ionization mass spectrometry using a highly sensitive silicotungstic acid emitter[J]. Analytical chemistry, 2019, 91(11): 7288-7294.
[7] Li C, Chu Z, Wang X, et al. Determination of 87Rb/86Sr and 87Sr/86Sr ratios and Rb–Sr contents on the same filament loading for geological samples by isotope dilution thermal ionization mass spectrometry[J]. Talanta, 2021, 233: 122537.

## Sheet: Cal-LA-Sr
Table S4, Sr isotope result of Eppawala calcite and reference materials using LA-MC-ICP-MS in this study.
Sample	Rb/Sr	87Sr/86Sr	2SE	84Sr/86Sr	88Sr (V)	n	Labs
Cal-01	1.16164e-06	0.705256	2.67896e-05	0.0554783	26.957		SS
Cal-02	-	0.705238	3.04404e-05	0.0555016	28.2559		SS
Cal-03	-	0.70524	2.80551e-05	0.055485	27.4465		SS
Cal-04	-	0.705258	2.73306e-05	0.0555028	28.0214		SS
Cal-05	-	0.705257	2.65087e-05	0.055492	29.3914		SS
Cal-06	-	0.705241	2.72108e-05	0.0555029	28.2629		SS
Cal-07	2.81244e-06	0.705249	3.16242e-05	0.0555037	29.115		SS
Cal-08	-	0.705253	2.27976e-05	0.0555149	29.8586		SS
Cal-09	1.09032e-06	0.705245	2.90566e-05	0.0555064	29.6385		SS
Cal-10	-	0.705253	2.66795e-05	0.0555086	28.5061		SS
Cal-11	5.87704e-07	0.705249	3.75386e-05	0.055493	10.733		SS
Cal-12	5.51348e-08	0.705326	0.000102303	0.0554625	26.8561		SS
Cal-13	1.51195e-07	0.705233	3.67196e-05	0.0554848	23.296		SS
Cal-14	-	0.705266	4.32652e-05	0.0554544	25.7096		SS
Cal-15	1.69146e-06	0.70525	2.65315e-05	0.0554703	26.9355		SS
Cal-16	3.1697e-06	0.705247	2.3946e-05	0.0554722	27.9815		SS
Cal-17	1.20296e-06	0.70524	2.54504e-05	0.055481	26.9366		SS
Cal-18	-	0.705286	3.17916e-05	0.0555008	26.0239		SS
Cal-19	-	0.705254	2.88338e-05	0.0554689	30.021		SS
Cal-20	2.12316e-06	0.705261	2.24117e-05	0.0554703	26.9573		SS
Cal-21	1.14385e-06	0.705236	3.8506e-05	0.0554641	10.9344		SS
Cal-22	1.17398e-06	0.70529	3.7892e-05	0.0554944	19.2381		SS
Cal-23	-	0.705251	3.5757e-05	0.0555247	10.9782		SS
Cal-24	3.61317e-06	0.705278	4.07562e-05	0.0555677	10.2431		SS
Cal-25	8.47734e-07	0.705242	3.47812e-05	0.0555198	10.1884		SS
Cal-26	-	0.70527	4.11504e-05	0.0556022	9.43756		SS
Cal-27	-	0.70525	3.87459e-05	0.0556729	9.80182		SS
Cal-28	2.56966e-06	0.705268	4.11042e-05	0.0556946	8.73019		SS
Cal-29	-	0.705223	3.81808e-05	0.0555544	11.3387		SS
Cal-30	-	0.705329	4.429e-05	0.0555381	10.8919		SS
Cal-31	-	0.705282	3.47828e-05	0.0556127	10.4147		SS
Cal-32	-	0.705271	4.17601e-05	0.0556493	9.62077		SS
Cal-33	-	0.705287	4.12887e-05	0.0556767	10.1236		SS
Cal-34	-	0.705269	3.94819e-05	0.055703	10.1011		SS
Cal-35	4.29657e-06	0.705256	2.84568e-05	0.0555712	25.7432		SS
Cal-36	-	0.705285	3.58423e-05	0.0555873	21.8441		SS
Cal-37	-	0.705268	2.92328e-05	0.0555731	26.5106		SS
Cal-38	-	0.705255	3.1519e-05	0.0555929	23.957		SS
Cal-39	-	0.705274	2.62557e-05	0.0555819	23.6601		SS
Cal-40	-	0.70527	4.78587e-05	0.0556957	9.76862		SS
	1.73067e-06	0.705261	0.00004(2SD)	0.0555408	20.5108	40	SS
Durango	2.42614e-05	0.706274	0.000127005	0.0602826	1.90415		SS
MAD	0.000137164	0.711796	3.80123e-05	0.0565673	8.98861		SS
MAD	2.43473e-05	0.71179	3.75699e-05	0.0565257	8.74515		SS
MAD	4.89763e-05	0.711825	4.02457e-05	0.0565691	8.65747		SS
MAD	3.03443e-05	0.711774	4.14024e-05	0.0566664	8.72769		SS
MAD	2.12703e-05	0.711826	4.44195e-05	0.0564739	9.70244		SS
	5.24205e-05	0.711802	0.00005(2SD)	0.0565605	8.96427	5	SS
2SD = 2* standard deviation calculated from n separate runs; denotes long-term “external” reproducibility, 2SE(2σ) = 2* standard error of the mean; denotes within-run (“internal”) precision of the data.

## Sheet: LA-Nd
Table S5, Nd isotope result of Eppawala-AP and reference materials using LA-MC-ICP-MS in this study.
Sample	143Nd/144Nd	2SE	145Nd/144Nd	2SE	147Sm/144Nd	2SE	n	Labs
Nd-01	0.511942	2.48139e-05	0.348414	1.49845e-05	0.0872422	0.000708928		SS
Nd-02	0.511926	2.37537e-05	0.348408	1.58684e-05	0.0863384	0.000697651		SS
Nd-03	0.511936	2.65529e-05	0.348405	1.69621e-05	0.0869355	0.000690896		SS
Nd-04	0.511881	2.58064e-05	0.348394	1.41274e-05	0.086567	0.000676521		SS
Nd-05	0.511906	2.57459e-05	0.348442	1.45514e-05	0.0869394	0.000715035		SS
Nd-06	0.511912	2.82981e-05	0.348422	1.60175e-05	0.0872924	0.00070365		SS
Nd-07	0.511921	2.5359e-05	0.348414	1.27638e-05	0.0874696	0.000703809		SS
Nd-08	0.511903	2.47963e-05	0.348434	1.45091e-05	0.087635	0.000723903		SS
Nd-09	0.511914	2.47893e-05	0.348425	1.55039e-05	0.0866114	0.000672286		SS
Nd-10	0.511939	2.59856e-05	0.348419	1.56396e-05	0.0863122	0.000656415		SS
Nd-11	0.511932	2.47136e-05	0.348431	1.67037e-05	0.088303	0.000157743		SS
Nd-12	0.511892	2.46125e-05	0.34839	1.45548e-05	0.0879659	0.000165634		SS
Nd-13	0.511894	2.57541e-05	0.348406	1.56765e-05	0.0874564	0.00017495		SS
Nd-14	0.511895	2.75328e-05	0.348412	1.48809e-05	0.0874916	0.000144366		SS
Nd-15	0.511903	3.1461e-05	0.348418	1.84715e-05	0.0864722	0.00013641		SS
Nd-16	0.511872	2.78503e-05	0.348446	1.52372e-05	0.0870793	0.000141413		SS
Nd-17	0.511973	2.77447e-05	0.348413	1.99268e-05	0.0870021	0.000161327		SS
Nd-18	0.511923	2.73269e-05	0.348428	1.8311e-05	0.0875508	0.000146847		SS
Nd-19	0.511927	2.61426e-05	0.348423	1.42685e-05	0.0872138	0.000138098		SS
Nd-20	0.511947	2.6724e-05	0.348414	1.57726e-05	0.0881299	0.000155048		SS
Nd-21	0.511944	2.40296e-05	0.348421	2.0127e-05	0.0860156	0.000787252		SS
Nd-22	0.51192	2.52839e-05	0.348409	1.51264e-05	0.0852417	0.000782716		SS
Nd-23	0.511904	2.29896e-05	0.348416	1.36143e-05	0.085166	0.000786674		SS
Nd-24	0.511903	2.36389e-05	0.348417	1.48302e-05	0.0851935	0.000776752		SS
Nd-25	0.511921	2.47912e-05	0.348417	1.43658e-05	0.0849677	0.000797868		SS
Nd-26	0.511902	2.49619e-05	0.348408	1.71568e-05	0.0850908	0.000811461		SS
Nd-27	0.511936	2.68645e-05	0.34842	1.32975e-05	0.0850274	0.000784004		SS
Nd-28	0.511929	2.42311e-05	0.348394	1.69558e-05	0.0848602	0.000795574		SS
Nd-29	0.511921	2.71581e-05	0.348402	1.56677e-05	0.0864871	0.000820399		SS
Nd-30	0.511935	2.47476e-05	0.348399	1.60701e-05	0.0865362	0.000777001		SS
	0.511918	0.000043(2SD)	0.348415	0.000026(2SD)	0.0866198	0.0020(2SD)	30	SS
Durango	0.512481	2.23001e-05	0.348415	1.30086e-05	0.0845246	0.000699294		SS
Durango	0.51246	2.01485e-05	0.348418	1.44772e-05	0.0843306	0.000746089		SS
Durango	0.512473	2.09829e-05	0.348411	1.46959e-05	0.0850844	0.000703421		SS
Durango	0.512469	2.27515e-05	0.348414	1.48278e-05	0.084801	0.000729213		SS
Durango	0.512489	2.30474e-05	0.348426	1.24295e-05	0.0857324	0.000681358		SS
Durango	0.512485	2.13477e-05	0.348429	1.20228e-05	0.0856469	0.000668049		SS
Durango	0.512485	2.13515e-05	0.348403	1.35788e-05	0.0841581	0.00078404		SS
Durango	0.512483	2.13961e-05	0.348425	1.56742e-05	0.0839937	0.000773292		SS
Durango	0.512482	2.3431e-05	0.348399	1.47052e-05	0.0791806	3.90079e-05		SS
Durango	0.512471	2.1221e-05	0.34841	1.09182e-05	0.0799597	4.99063e-05		SS
	0.512478	0.000018(2SD)	0.348415	0.000020 (2SD)	0.0837412	0.0046(2SD)	10	SS
MAD	0.511365	3.08958e-05	0.348401	1.76385e-05	0.0868985	0.000800964		SS
MAD	0.511365	2.8694e-05	0.348406	1.50671e-05	0.0870331	0.000671974		SS
MAD	0.511348	3.77473e-05	0.348415	1.7445e-05	0.0818	3.17901e-05		SS
MAD	0.511352	2.63784e-05	0.348374	1.37475e-05	0.0812969	3.92516e-05		SS
	0.511358	0.000018(2SD)	0.348399	0.000036(2SD)	0.0842571	0.0063(2SD)	4	SS
2SD = 2* standard deviation calculated from n separate runs; denotes long-term “external” reproducibility, 2SE(2σ) = 2* standard error of the mean; denotes within-run (“internal”) precision of the data.
