# Supplementary material for: Further characterizing Eppawala-AP as a potential Cl-rich apatite Sr isotope reference material
Source: Royal Society of Chemistry journal article supplement (doi:10.1039/d2ja00013j), 2022-01-01
Supplement: d2ja00013j2.xlsx [file d2ja00013j2.xlsx]

## Sheet: TE
Table 1, Summary of trace element concentration for Eppawala-AP.
Element	Max	Min	Avg	n	RSD%	Element	Max	Min	Avg	n	RSD%
La	702.015	448.836	525.147	50	12.3514	Cs	0.00841108	-	0.002415	50	114.207
Ce	1512.74	1000.99	1149.44	50	10.0963	Rb	0.0597162	-	0.0117448	50	117.108
Pr	178.787	128.914	145.536	50	8.32498	Ba	39.458	19.0273	33.259	50	14.8696
Nd	699.805	536.588	601.298	50	7.18569	Th	78.0532	60.6358	69.6819	50	6.28275
Sm	98.3898	77.0759	86.257	50	6.17231	U	4.50031	3.53719	4.01545	50	4.83495
Eu	21.7328	15.004	17.0044	50	9.80022	Nb	0.0763867	0.0356573	0.0543754	50	17.3014
Gd	52.9227	39.8713	46.0949	50	6.04317	K	31.4933	0.254062	3.81044	50	139.625
Tb	4.55962	3.53232	4.0119	50	6.14878	Pb	8.23339	5.98915	6.77026	50	6.20117
Dy	18.742	13.7665	15.8405	50	6.51585	Sr	4622.75	3975.93	4236.87	50	3.38672
Ho	2.77131	2.00675	2.35819	50	6.64783	Zr	2.48377	1.57633	2.03612	50	12.6837
Er	5.85803	4.27293	4.88748	50	7.34567	Hf	0.0166922	-	0.00557277	50	71.4792
Tm	0.639725	0.437743	0.533871	50	7.61332	Ti	16.2681	5.27268	7.75115	50	22.2325
Yb	3.31003	2.42711	2.87109	50	7.59646	Y	75.1349	54.1836	62.1291	50	6.76396
Lu	0.421281	0.294432	0.355032	50	8.8521
element concentration unit: "μg/g(ppm)" RSD, relative standard deviation, -, below detection limit.

## Sheet: Sr&Nd
Table 2, Summary of Sr and Nd isotope composition for Eppawala-AP measured by LA-MC-ICP-MS and TIMS.
Methods	Labs	87Sr/86Sr	2SE	87Sr/86Sr	2SE	87Sr/86Sr	2SD	n
		Min		Max		Avg
LA-MC-ICPMS	HFUT	0.704878	4.5238e-05	0.705079	3.29924e-05	0.704964	0.000102928	44
	CUG	0.704874	3.36573e-05	0.705029	8.523e-05	0.704935	6.72736e-05	40
	SS	0.704994	2.37361e-05	0.705063	3.15807e-05	0.705028	3.69608e-05	50
TIMS	IGGCAS	0.70498	1.1e-05	0.705008	1e-05	0.704992	2.19272e-05	5
	CUG	0.704983	1.00776e-05	0.704988	9.38839e-06	0.704986	3.60881e-06	4
	Labs	143Nd/144Nd	2SE	143Nd/144Nd	2SE	143Nd/144Nd	2SD	n
		Min		Max		Avg
LA-MC-ICPMS	SS	0.511872	2.78503e-05	0.511973	2.77447e-05	0.511918	4.32981e-05	30
2SE(2σ), 2*the standard error of the mean, denotes within-run (“internal”) precision of the data.
